# Supplementary material for: The role of PDF neurons in setting the preferred temperature before dawn in Drosophila
Source: eLife journal article supplement (doi:10.7554/elife.23206), 2017-05-02
Supplement: supp [file fly_matlab.pdf › flytoolbox(new)/fly_matlab.pdf]

# Matlab Functions for Support of Fly Data

Pablo Funes

## FLYDATA format I/O

### Function **a=readfly(dirname)**

Reads data from FLYDATA.\* files obtained from the data collection station.

#### *dirname*

Name of the directory where the FLYDATA.\* files are located. Use '.' for the current directory.

#### *a*

Matrix *a* is output which has one row per FLYDATA file, which means that each column will have a well and each row will have a time frame.

Reading starts with FLYDATA.001 and stops when a file is found which has a different number of wells than the previous ones, so the output is a square matrix.

## Processing

### Function **b=fly\_shuffle(a)**

Uses Matlab's *randperm* function to shuffle the columns of a fly matrix. Note: Every well is shuffled with identical permutation.

#### *a*

A fly data matrix (one well per column) to be shuffled

#### *b*

Shuffled data matrix, one well per column.

## Dusty Dowse Compatibility

### Function `a=dusty_read(filename)`

Reads a data matrix from Dusty's "RAW" format

#### *filename*

Name of the file to be read.

#### *a*

The output is square matrix *a* with a well per column (so column 1 is well 1, etc.).

### File Format

Dusty's format looks like

```
Well  1 (%3d)
      x1 (%16.6f)
      x2
      ...
      -5000.0
Well  2
...
END
```

### Function `dusty_save(a,filename)`

Writes a data matrix into a file with Dusty's "Raw" format.

#### *a*

Data matrix with one column per well.

#### *filename*

Name of the new file Matlab will create this file in Dusty's "raw" format.
