# Supplementary figures and images for: The role of PDF neurons in setting the preferred temperature before dawn in Drosophila
Source: eLife journal article supplement (doi:10.7554/elife.23206), 2017-05-02

# Fig. 2. Suppl.1 Tang

*Clk9M-Gal4::UAS-CD4:spGFP1-10; Pdf-Gal80 / Pdf-LexA::LexAop-CD4:spGFP11*

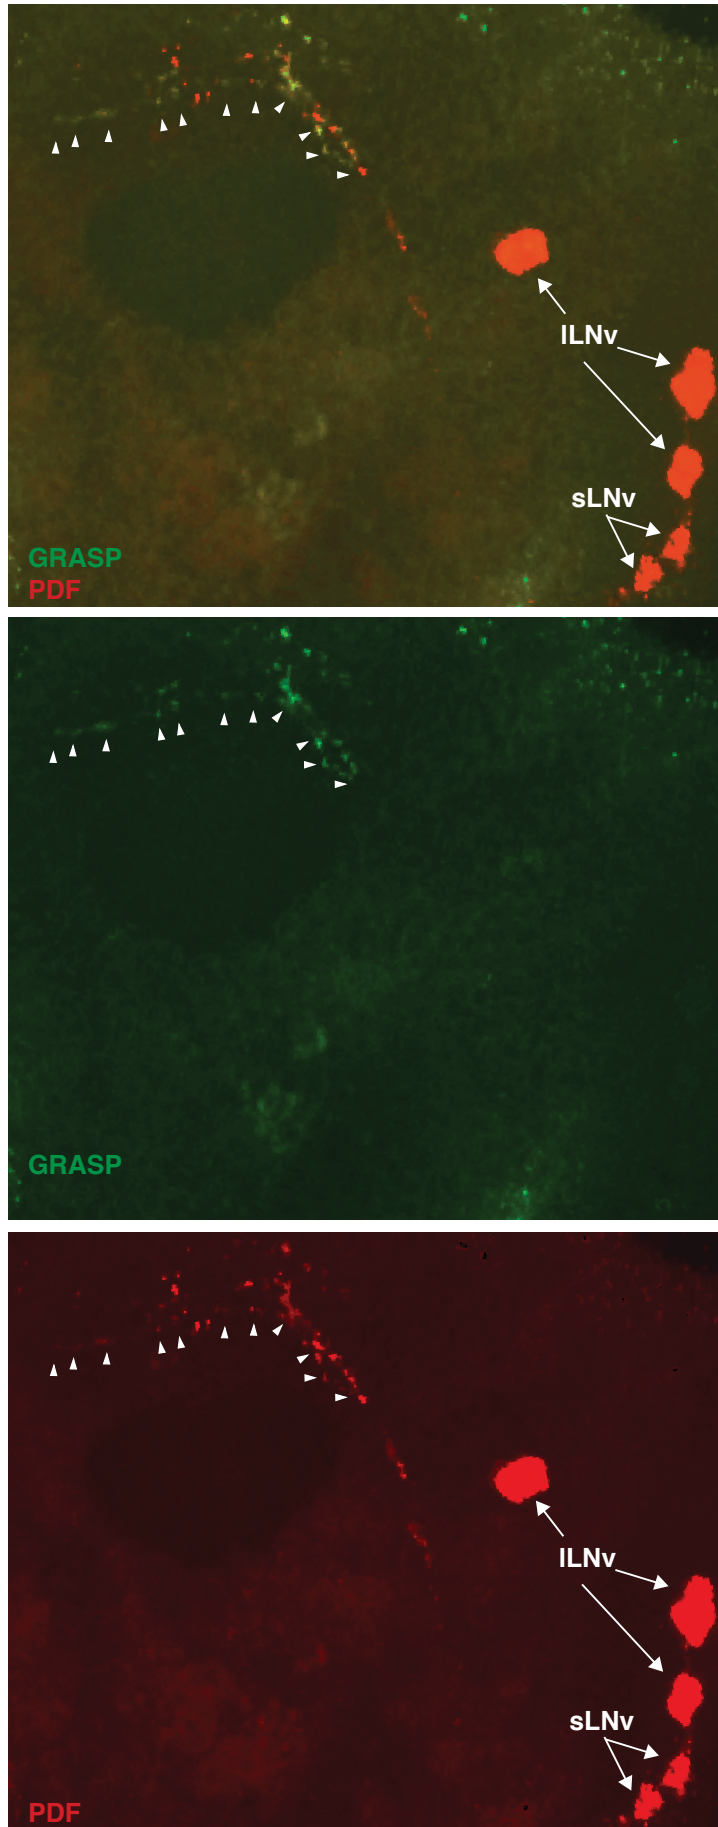

Supplement: supp [file elife_poa_e23206_Figure_2_figure_supplement_1.pdf › elife_poa_e23206_Figure_2_figure_supplement_1.pdf]

# Fig. 3. Suppl.1 Tang

*Clk9M-Gal4::UAS-GCaMP3.0 / LexAop-P2X2*

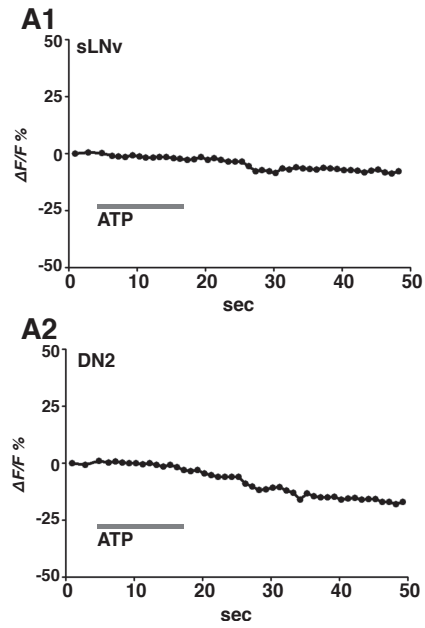

Supplement: supp [file elife_poa_e23206_Figure_3_figure_supplement_1.pdf › elife_poa_e23206_Figure_3_figure_supplement_1.pdf]

# Fig. 3. Suppl.2 Tang

*Clk9M-Gal4/UAS-mCD8:GFP; Pdf-Gal80/+*

**A**

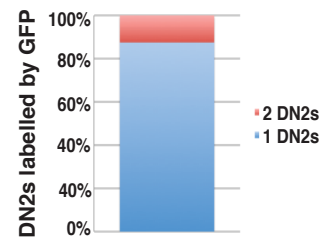

**B**

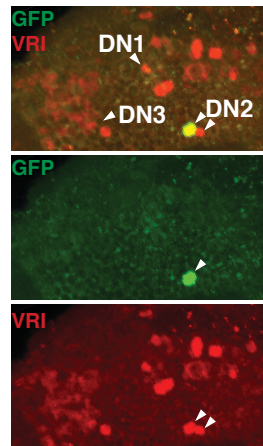

Supplement: supp [file elife_poa_e23206_Figure_3_figure_supplement_2.pdf › elife_poa_e23206_Figure_3_figure_supplement_2.pdf]

# Fig. 4. Suppl.1 Tang

*NP0002-Gal4::UAS-mCD8:RFP*

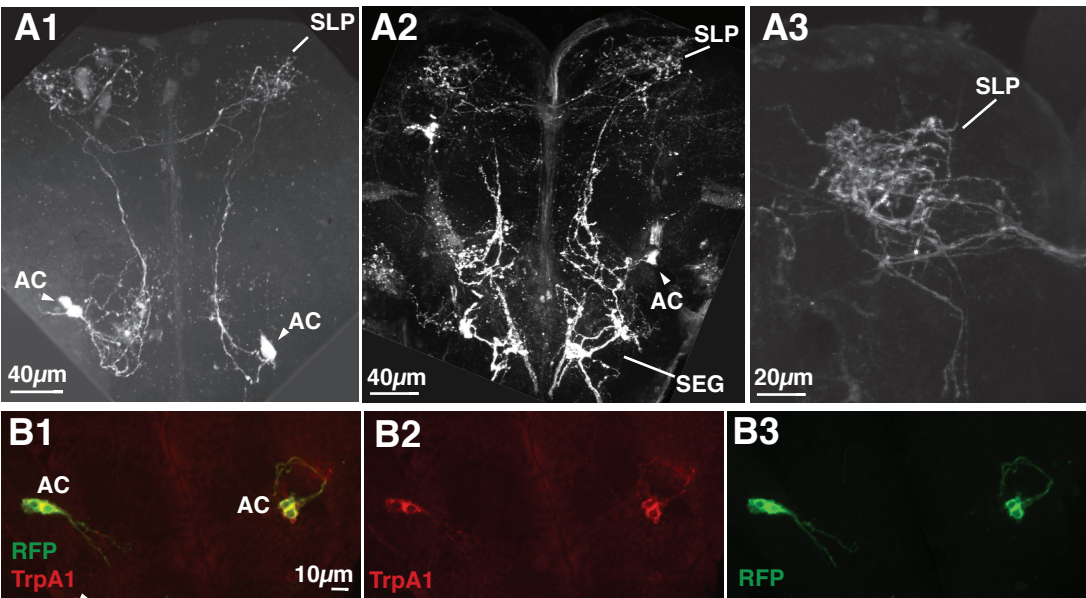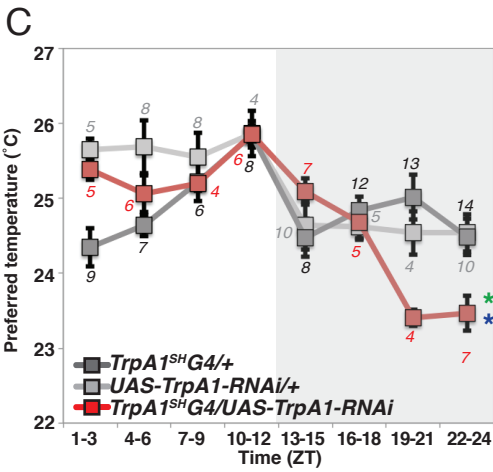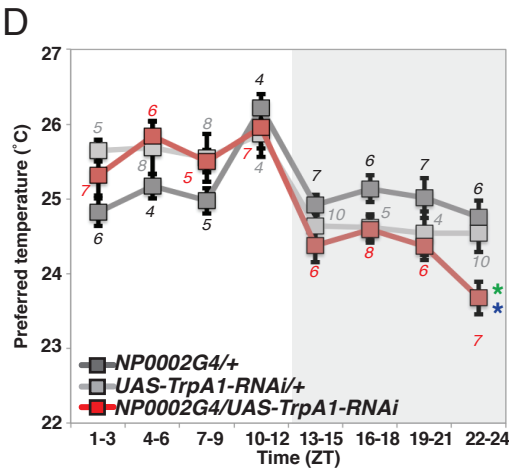

Supplement: supp [file elife_poa_e23206_Figure_4_figure_supplement_1.pdf › elife_poa_e23206_Figure_4_figure_supplement_1.pdf]

# Figure. 4 Suppl.2 Tang

*TrpA1<sup>SH</sup>-Gal4::UAS-MCD8:GFP*

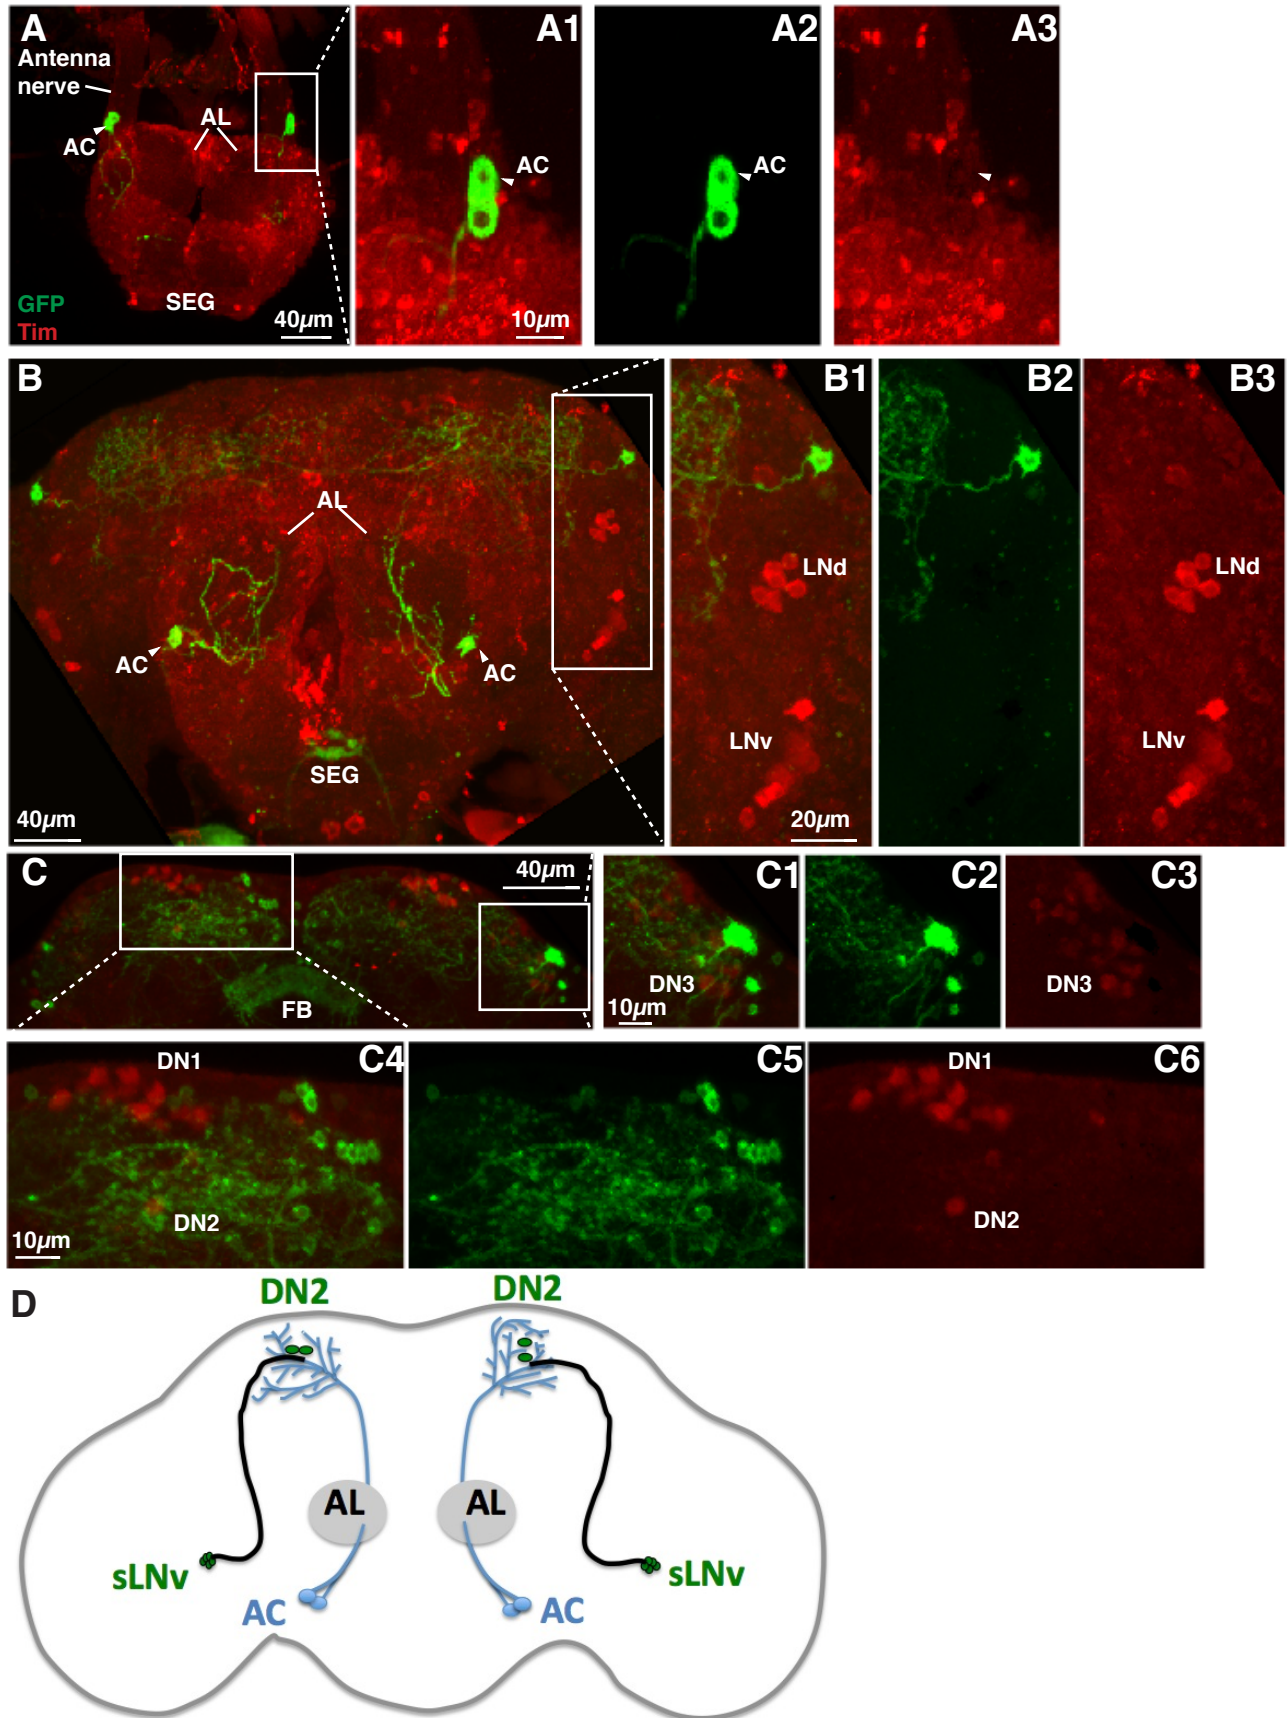

Supplement: supp [file elife_poa_e23206_Figure_4_figure_supplement_2.pdf › elife_poa_e23206_Figure_4_figure_supplement_2.pdf]

# Fig.5, Suppl Fig 1 Tang

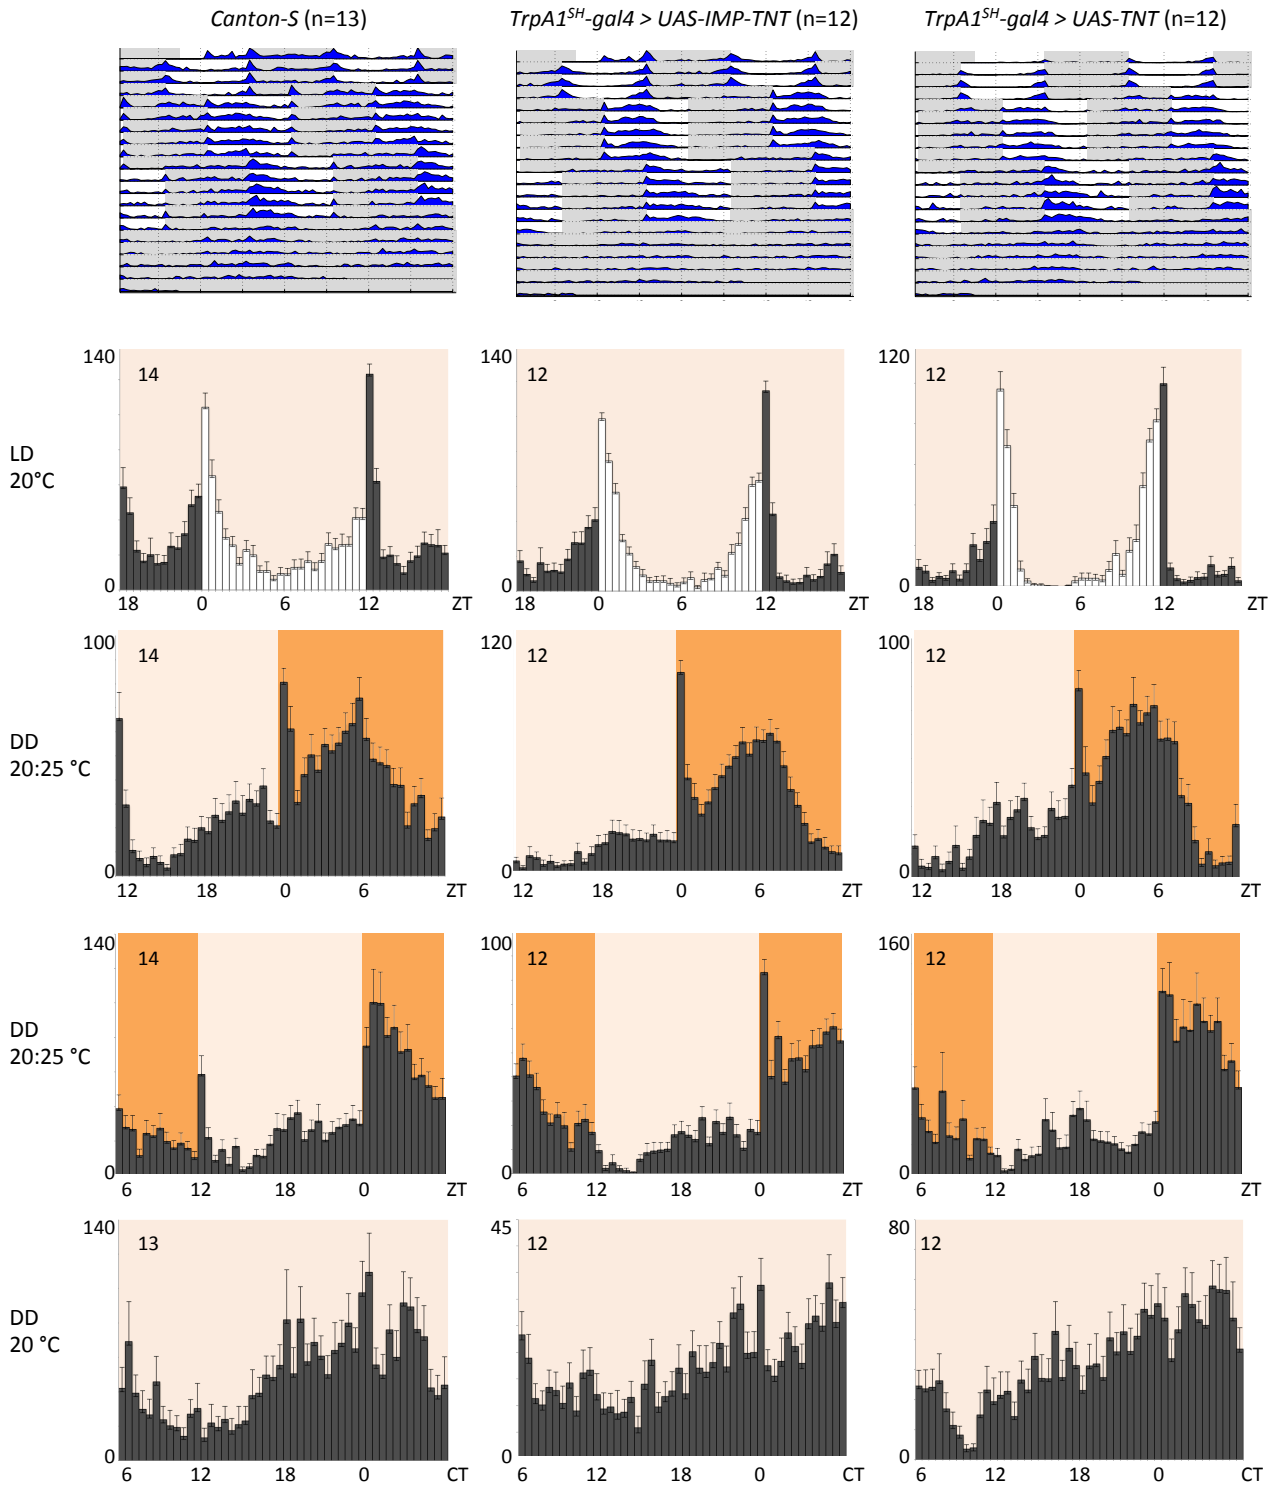

Supplement: supp [file elife_poa_e23206_Figure_5_figure_supplement_1.pdf › elife_poa_e23206_Figure_5_figure_supplement_1.pdf]

# Fig 5, Suppl Figure 2 Tang

A

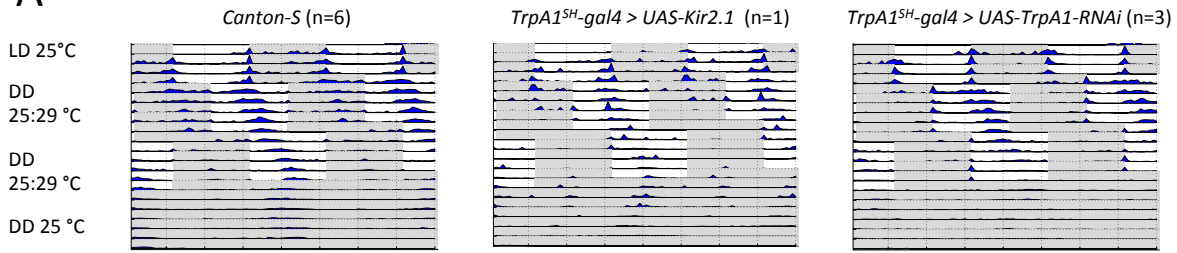

B

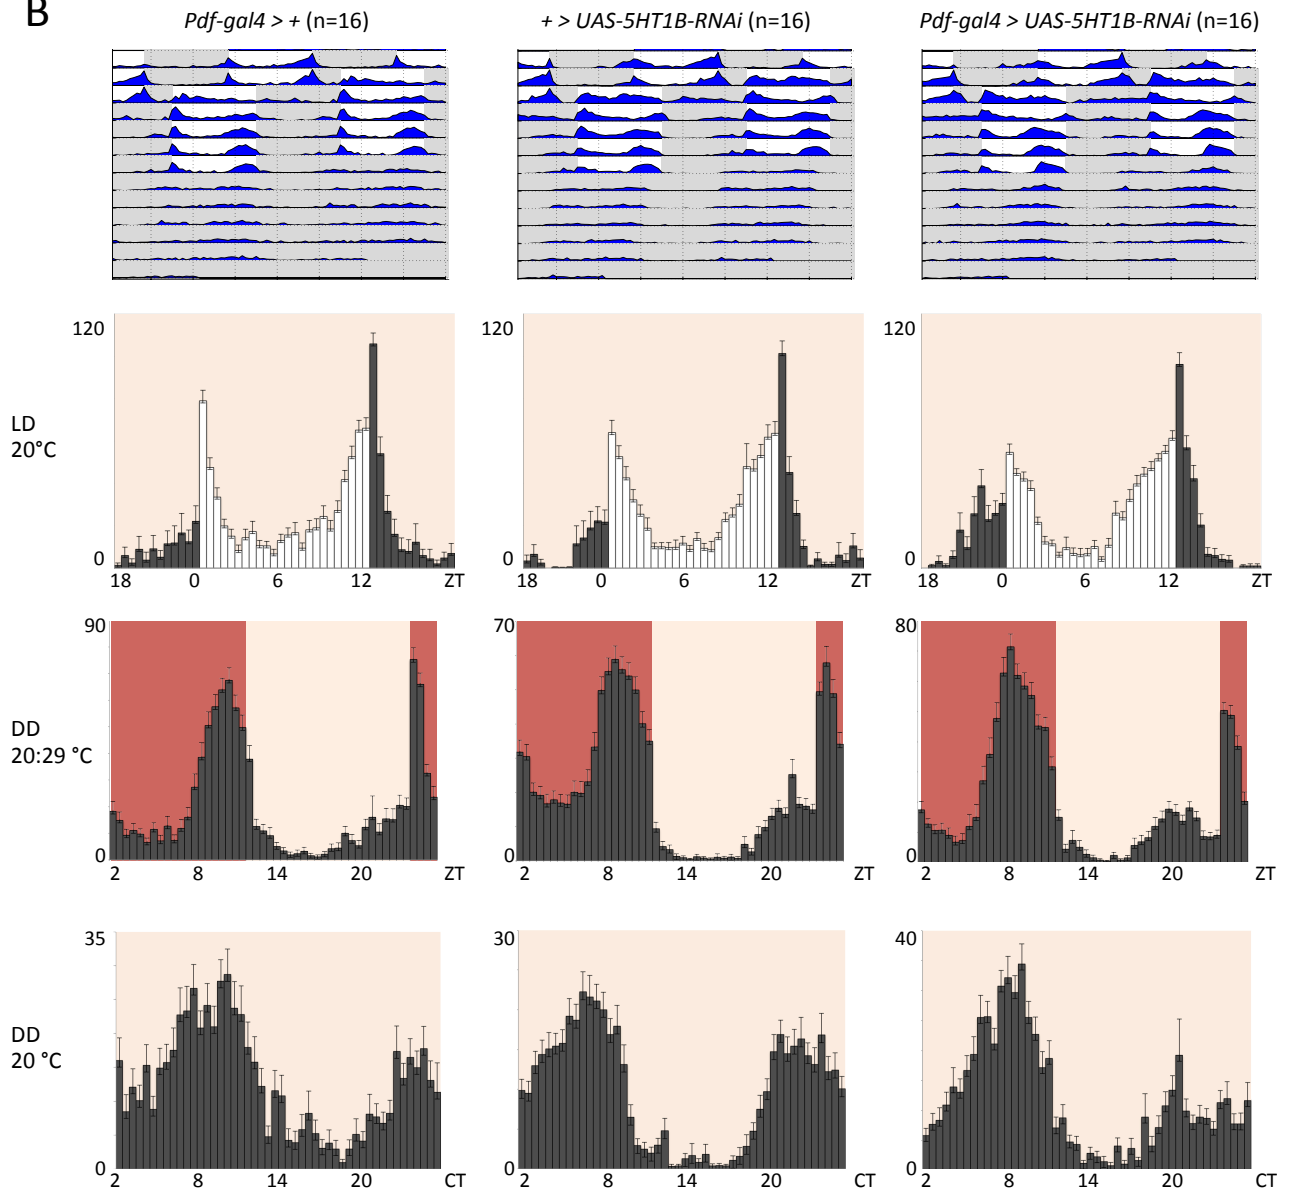

Supplement: supp [file elife_poa_e23206_Figure_5_figure_supplement_2.pdf › elife_poa_e23206_Figure_5_figure_supplement_2.pdf]
